# Supplementary material for: Controlled synthesis of peony-shaped photocatalyst grains of Ag3PO4/Zn3(PO4)2 by coprecipitation and recrystallization technology
Source: Royal Society of Chemistry journal article supplement (doi:10.1039/c5ra05063d), 2015-01-01
Supplement: c5ra05063d1.pdf [file c5ra05063d1.pdf]

## Support Information

### Controlled Synthesis of Peony-Shaped Photocatalyst Grains of $\text{Ag}_3\text{PO}_4/\text{Zn}_3(\text{PO}_4)_2$ by Coprecipitation and Recrystallization Technology

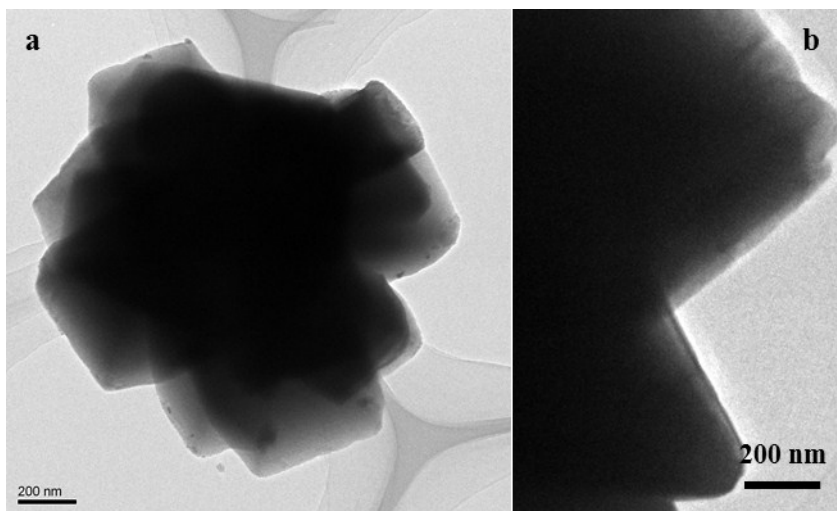

Fig.1S. a) high - magnification TEM images of flower-shaped  $\text{Ag}_3\text{PO}_4/\text{Zn}_3(\text{PO}_4)_2$  composite. b) TEM image taken from the edge of the composite.

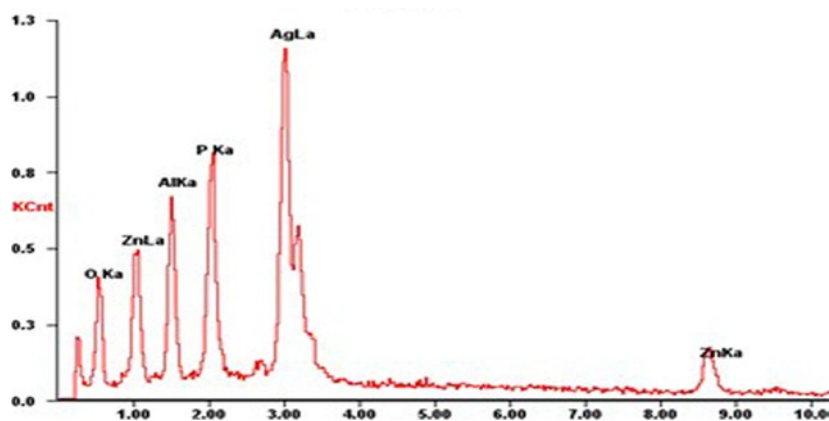

Fig.2S. EDX analysis of as-synthesized sample.

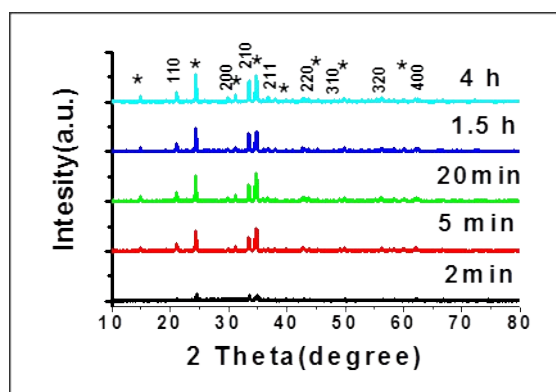

Fig.3S. XRD patterns of samples extracted from the solution for preparing peony-shaped  $\text{Ag}_3\text{PO}_4/\text{Zn}_3(\text{PO}_4)_2$  composite at different reaction times. The peaks labeled with asterisk are assigned to orthorhombic  $\text{Zn}_3(\text{PO}_4)_2$  and the other peaks can be indexed to cubic  $\text{Ag}_3\text{PO}_4$  crystals. The sample separated from solution at 2 min shows a weak XRD pattern. It can be deduced to be  $\text{AgAc}$  crystals based on the reaction phenomenon. It also shows a band-like structure similar to the commercial  $\text{AgAc}$  (Fig.4S).

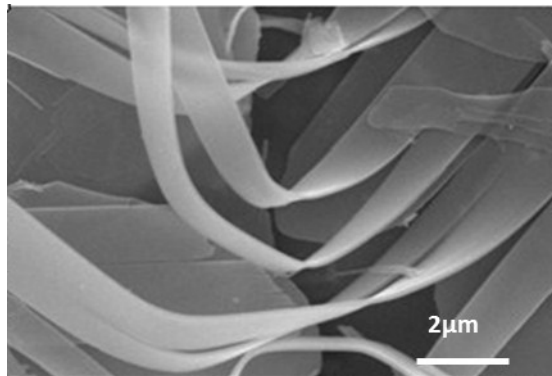

Fig.4S. The SEM image of sample separated from the solution at 2 min.

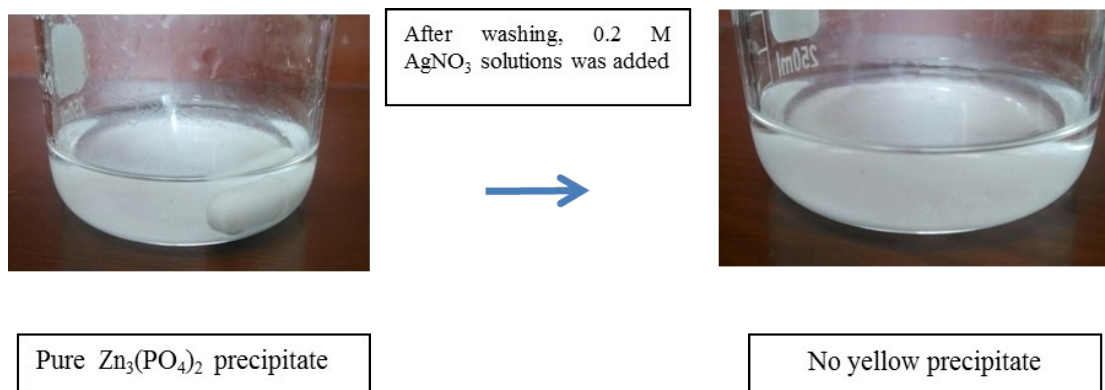

Fig.5S. The photos of the 20 ml of 0.15M Zn(NO<sub>3</sub>)<sub>2</sub> solution was mixed with 20 ml of 0.1M KH<sub>2</sub>PO<sub>4</sub> solution to obtain pure Zn<sub>3</sub>(PO<sub>4</sub>)<sub>2</sub> precipitate, then 20 ml of 0.2M AgNO<sub>3</sub> solution was added . After reacting for 2h, the white precipitate did not change its color, which indicates that after Zn<sub>3</sub>(PO<sub>4</sub>)<sub>2</sub> crystallizes, it is difficult to transform to Ag<sub>3</sub>PO<sub>4</sub> by ion-exchange process even in the Ag<sup>+</sup> saturated solution.

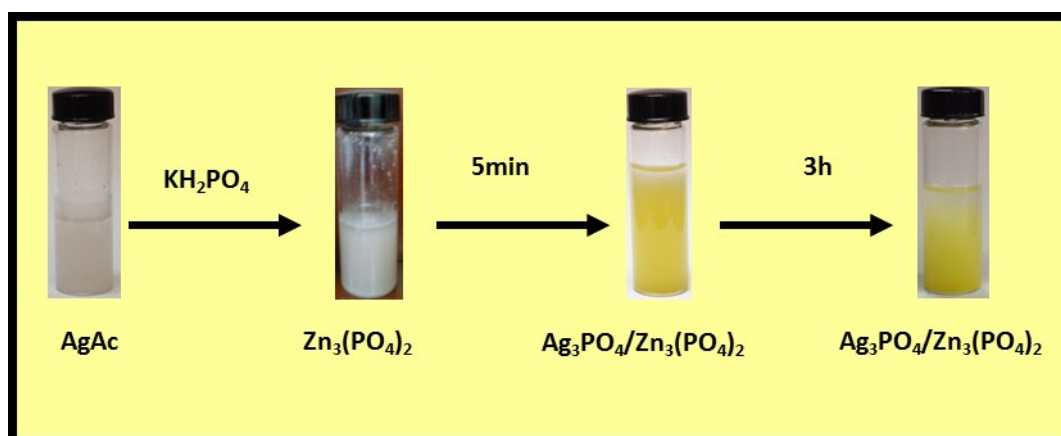

Fig.6S. The color change of the Ag<sub>3</sub>PO<sub>4</sub>/Zn<sub>3</sub>(PO<sub>4</sub>)<sub>2</sub> precipitates at different time

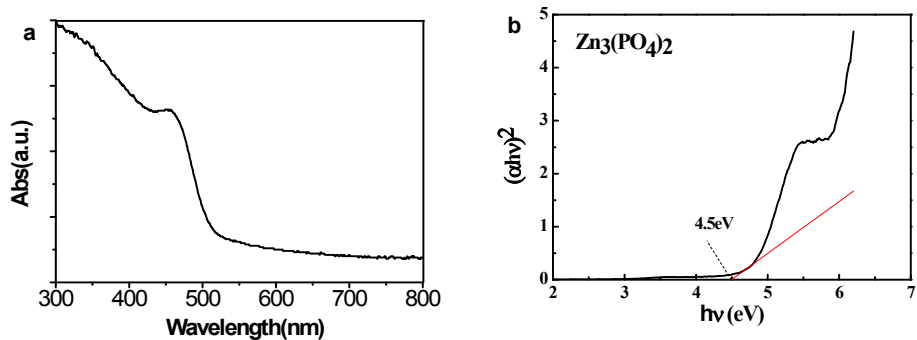

Fig.7S.a) UV-Vis diffusive absorption spectrum of pure  $\text{Ag}_3\text{PO}_4$  samples fabricated with 0.2M  $\text{AgNO}_3$  solution (20ml) and 0.1M  $\text{KH}_2\text{PO}_4$  (20ml). b) The calculation results of the bandgap of  $\text{Zn}_3(\text{PO}_4)_2$  based on the  $(\alpha h\nu)^2$ - $h\nu$  curve.

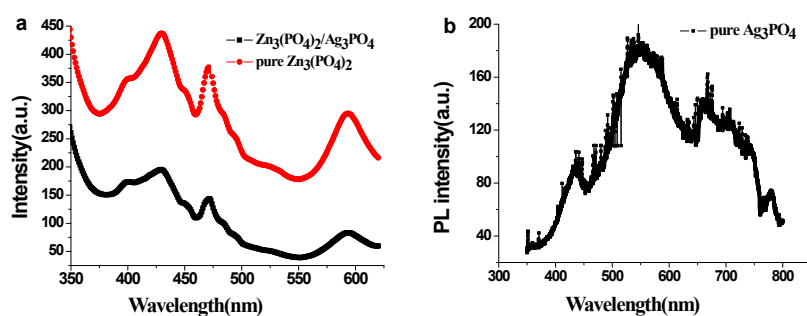

Fig.8S. Room temperature photoluminescence spectra of a) pure  $\text{Zn}_3(\text{PO}_4)_2$  and peony-shaped  $\text{Ag}_3\text{PO}_4/\text{Zn}_3(\text{PO}_4)_2$  composite and b) pure  $\text{Ag}_3\text{PO}_4$ .

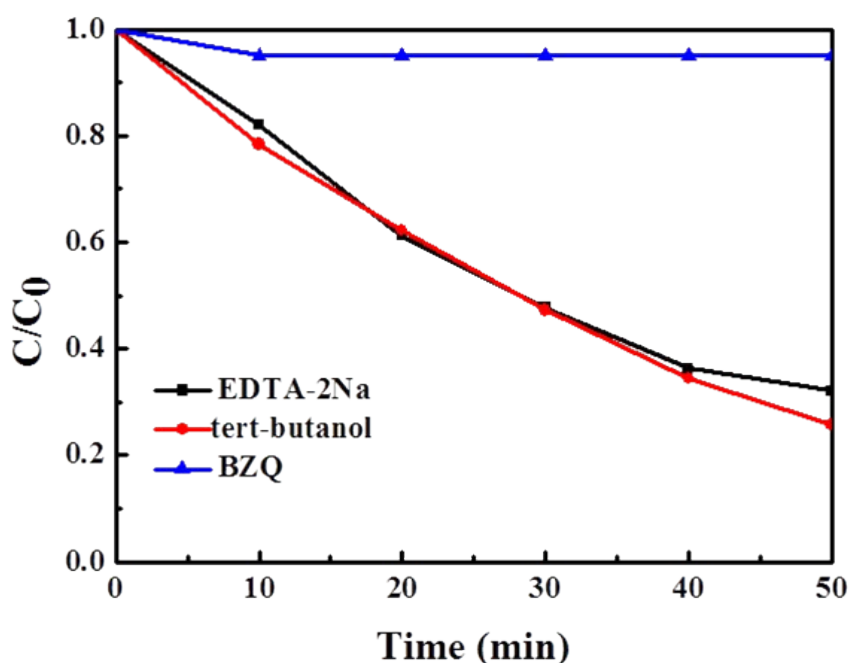

Fig.9S . Photocatalytic curves of RhB solution over peony- shaped  $\text{Ag}_3\text{PO}_4/\text{Zn}_3(\text{PO}_4)_2$  with the presence of different quenchers.

The calculation of the band gap ( $E_g$ ) of  $\text{Zn}_3(\text{PO}_4)_2$ :

According to the plot of  $(ah\nu)^{2/n}$  versus energy, the band gap ( $E_g$ ) of  $\text{Zn}_3(\text{PO}_4)_2$  has been calculated to be 3.2 eV, respectively. The band structure of  $\text{Zn}_3(\text{PO}_4)_2$  can be estimated according to the equations:

$$E_C = -(\chi(A)^a \cdot \chi(B)^b \cdot \chi(C)^c)^{1/(a+b+c)} + \frac{1}{2}E_g + E_0$$

$$E_V = E_C + E_g$$

where  $E_{VB}$  is the valence band edge potential,  $\chi$  is the electronegativity of the semiconductor, which is the geometric mean of the electronegativity of the constituent atoms, and  $E_0$  is the energy of free electrons on the hydrogen scale (about 4.5 eV vs NHE).  $\chi$  value of  $\text{Zn}_3(\text{PO}_4)_2$  is determined to be 6.16 eV.  $E_g$  of  $\text{Zn}_3(\text{PO}_4)_2$  is calculated to be 4.5eV, therefore, the  $E_{CB}$  and  $E_{VB}$  of  $\text{Zn}_3(\text{PO}_4)_2$  are 0.59 and 5.09 eV, respectively.
